# Supplementary material
Source: Copernicus journal article supplement (doi:10.5194/egusphere-2026-1613)
Supplement: Supplementary file 1 [file egusphere-2026-1613-supplement.pdf]

## Supplemental Information for

### **Assessment of aerosol iron (Fe) solubility using global dataset, Part I: Mechanisms underlying the inverse relationship between Fe solubility and Fe concentration**

Kohei Sakata<sup>1\*</sup>, Minako Kurisu<sup>2</sup>, and Yoshio Takahashi<sup>3</sup>

<sup>1</sup>Materials Science and Engineering, Graduate School of Engineering, Tokyo Denki University, 5 Senjyu-Asahi-Cho, Adachi-ku, Tokyo 120-8551, Japan.

<sup>2</sup>Atmosphere and Ocean Research Institute, The University of Tokyo, 5-1-5, Kashiwanoha, Kashiwa, Chiba 277-8564, Japan.

<sup>3</sup>Graduate School of Science, The University of Tokyo, 7-3-1, Hongo Bunkyo-ku, Tokyo 113-0033, Japan.

**Email:** [kohei.sakata.33@mail.dendai.ac.jp](mailto:kohei.sakata.33@mail.dendai.ac.jp)

ORCID: 0000-0002-0103-9631

#### **This PDF file includes:**

Supporting text

Figures S1 to S5

SI References

## Supporting Text

### S1. Sampling method for size-fractionated aerosol particles.

This study provides unpublished total and dissolved Fe and Al concentrations in size-fractionated marine aerosol particles collected in the Pacific Ocean. Size-fractionated aerosol particles were collected during the research cruise of R/V Hakuho-Maru (KH-14-6). A high-volume air sampler (Model-123SL, Kimoto, Japan) was installed on the compass deck at 13 m above sea level. Aerosol samples were separated into seven-size fractions using a Sierra-type cascade impactor (TE-236, Tisch Environmental Inc., USA, Table S1). Aerosol particles in stages 1 to 6 were collected on the custom-made polytetrafluoroethylene filter (Sakata et al., 2018, NAFLON™ PTFE tape, Nichias Co., Ltd., Japan). The filter was rinsed following sequential procedures: ultrapure water, 3 mol/L of HNO<sub>3</sub>, 3 mol/L of HCl, and ultrapure water. The HNO<sub>3</sub> and HCl were diluted from concentrated acids with electric grade (Kanto Chemical Co. Inc., Japan). The filter was heated at 150°C for one day in all procedures. The finest fraction was collected on a cellulose filter (Whatman 41, 516 cm<sup>2</sup>, GE Healthcare, USA), which was not pre-washed before sampling. The proportions of filter blank concentration relative to measurement concentration (=blank + sample) of T-Fe and T-Al were 9.1±4.9% and 2.6±2.7%, respectively.

The total digestion and water extraction of Fe and Al were performed based on Sakata et al. (2022). Briefly, total digestion and water extraction were performed using digested by a mixed acid (2 mL of 15.2 mol L<sup>-1</sup> HNO<sub>3</sub>, 2 mL of 9.3 mol L<sup>-1</sup> HCl, and 1 mL of 20 mol L<sup>-1</sup> HF, TAMAPURE-AA100). The mixed acid was evaporated to dryness, then the residue was redissolved in 5 mL of 0.15 mol L<sup>-1</sup> HNO<sub>3</sub>) and heated at 150°C for a few hours. The solution was filtrated by a hydrophilic PTFE membrane filter ( $\phi$ : 0.20  $\mu$ m, Dismic®, 25HP020AN, Advantec, Japan). Dissolvable Fe and Al were extracted by 5 mL of ultrapure water with ultrasonication for 30 min. The water-extracted solution was filtrated through the hydrophilic PTFE membrane filter, then the solution was acidified to 0.15 mol L<sup>-1</sup> of HNO<sub>3</sub> by 15.2 mol L<sup>-1</sup> of HNO<sub>3</sub>. All sample treatments were performed in a clean booth with HEPA filtrated air condition (SS-MAC 15) installed in a clean room (Class-10000). Total and dissolvable concentrations of Fe and Al were determined by inductively coupled plasma mass spectrometry (ICP-MS, Agilent7700, Agilent, Japan). Iron and Al concentrations were determined by helium gas and non-gas collision modes, respectively.

Supplemental Figure

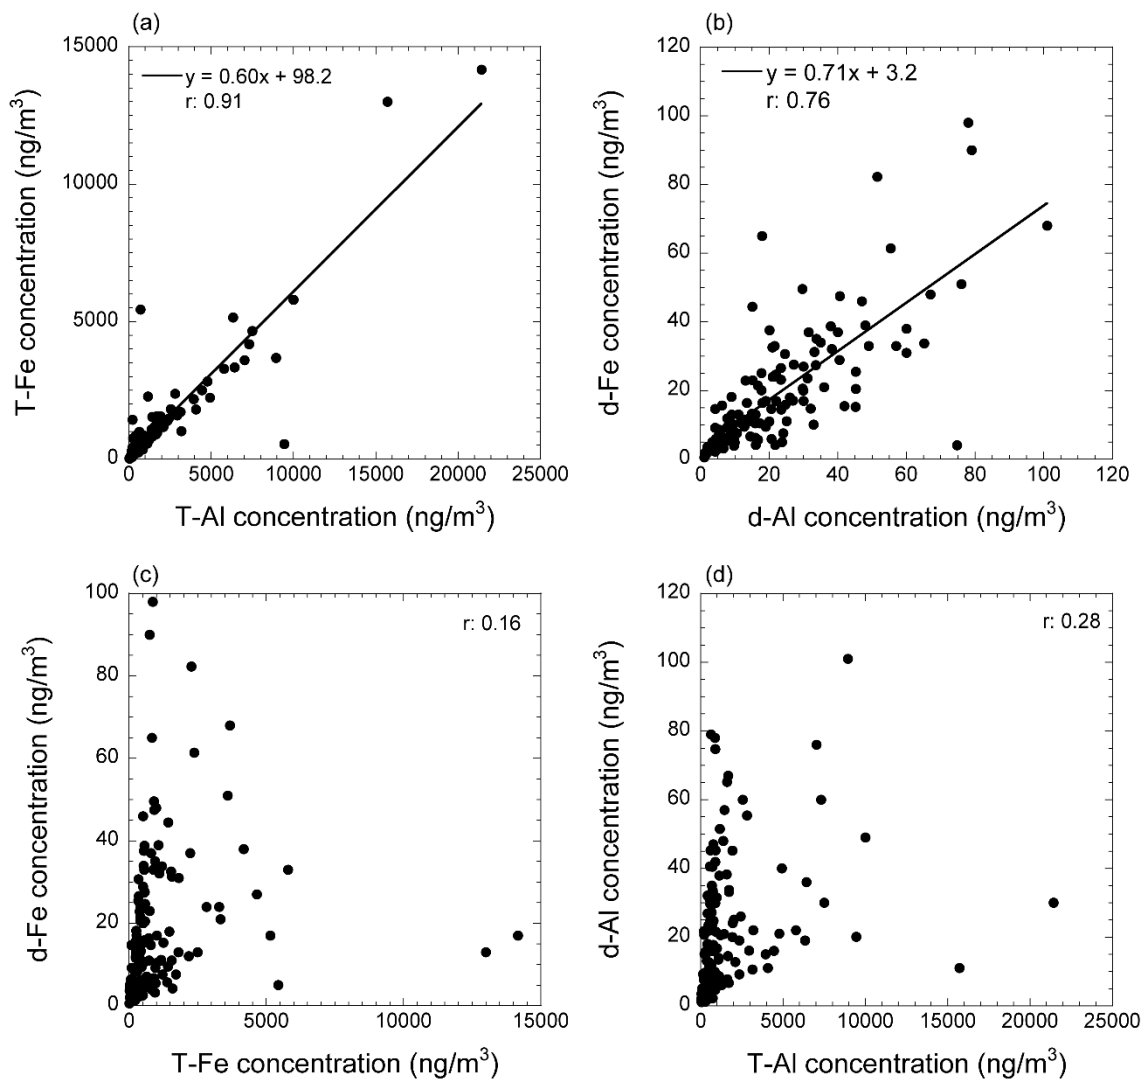

**Figure S1.** Scatter plots (a) between T-Al and T-Fe concentrations, (b) between d-Al and d-Fe concentrations, (c) between T-Fe and d-Fe concentrations, and (d) between T-Al and d-Al concentrations in aerosol particles collected in East Asia.

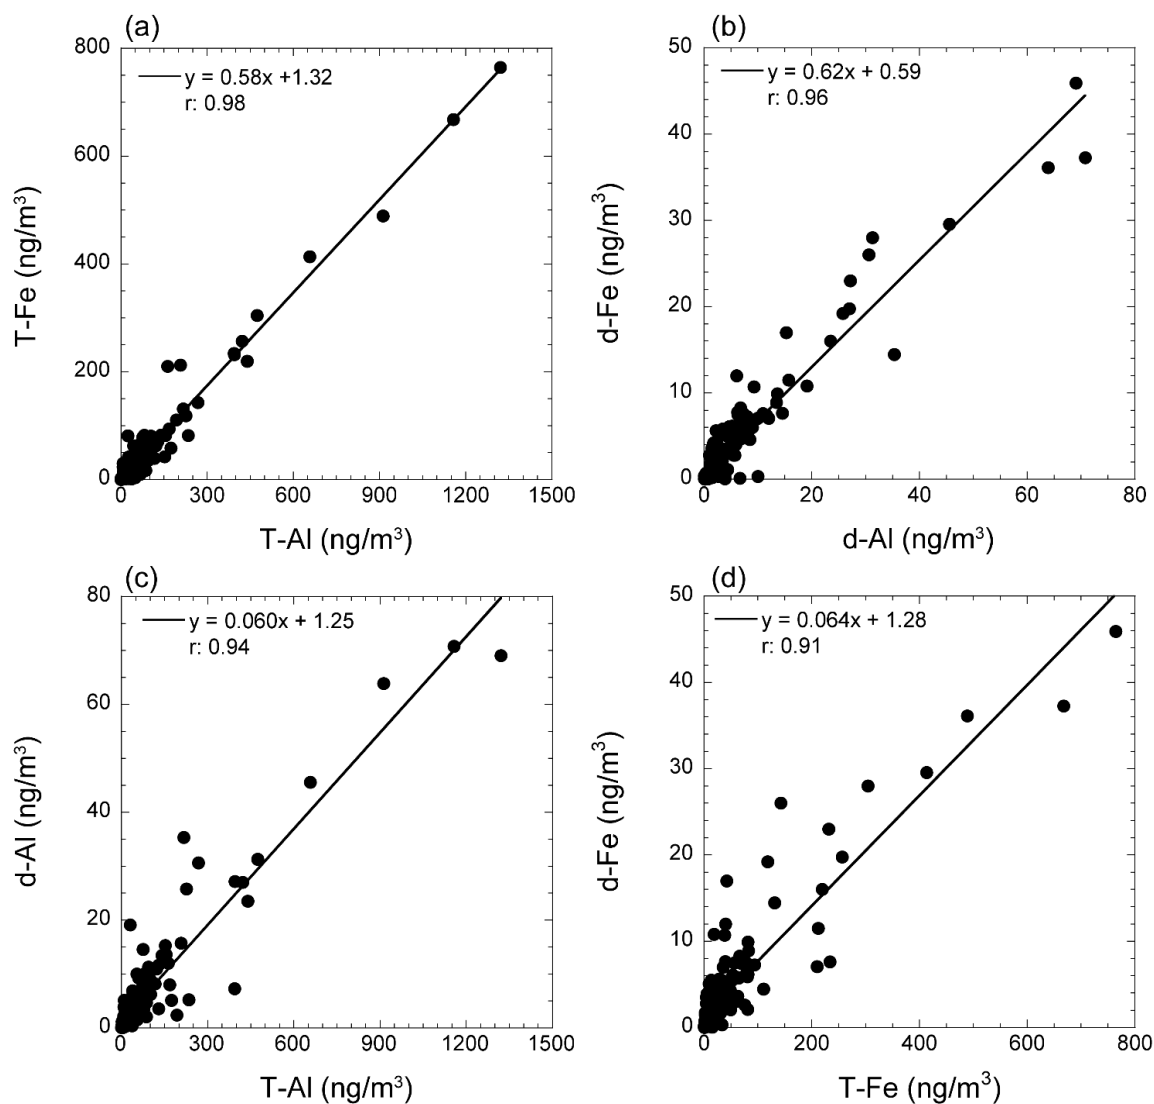

**Figure S2.** Scatter plots (a) between T-Al and T-Fe concentrations, (b) between d-Al and d-Fe concentrations, (c) between T-Fe and d-Fe concentrations, and (d) between T-Al and d-Al concentrations in aerosol particles collected in the North Pacific.

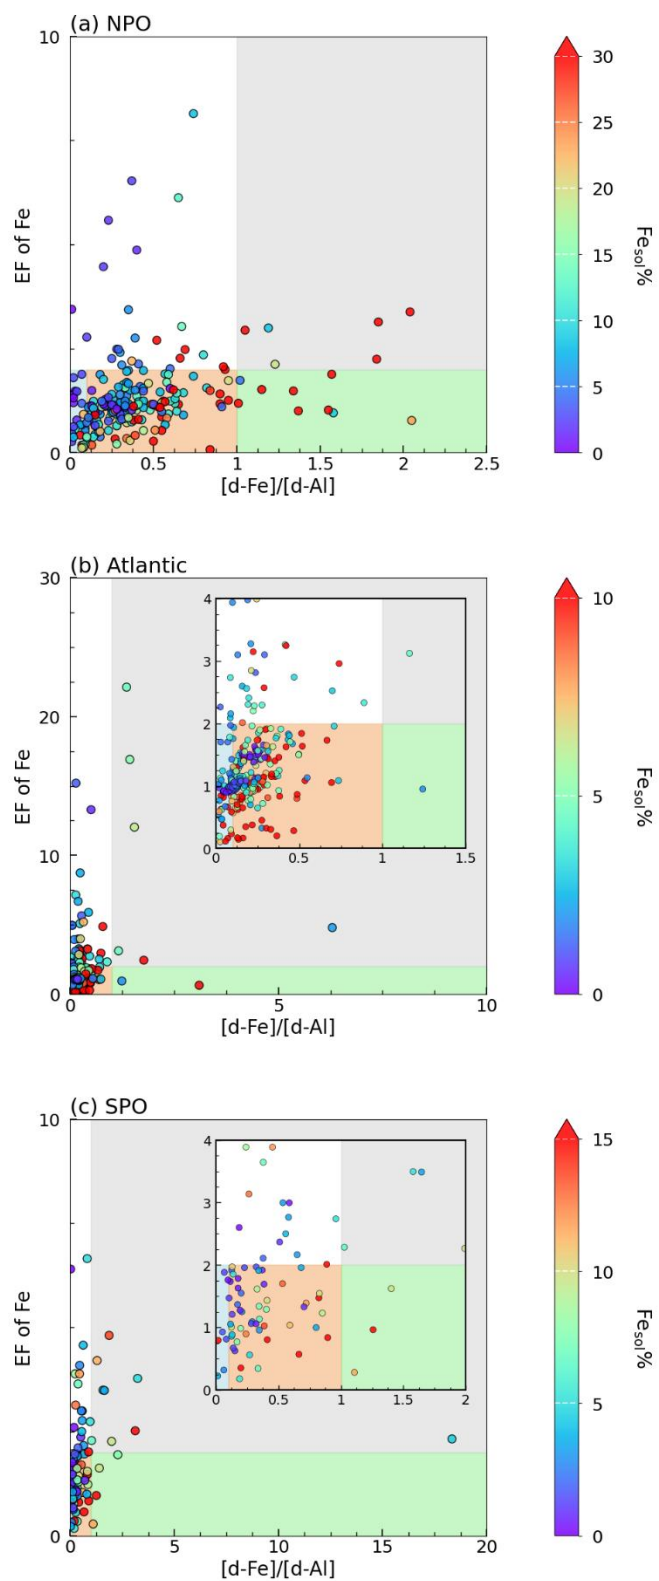

- **Figure S3.** Diagrams between  $[d-Fe]/[d-Al]$  ratio and  $EF_{T-Fe}$  in TSP collected above (a) the North Pacific, (b) the Atlantic, and (c) the South Pacific Oceans.

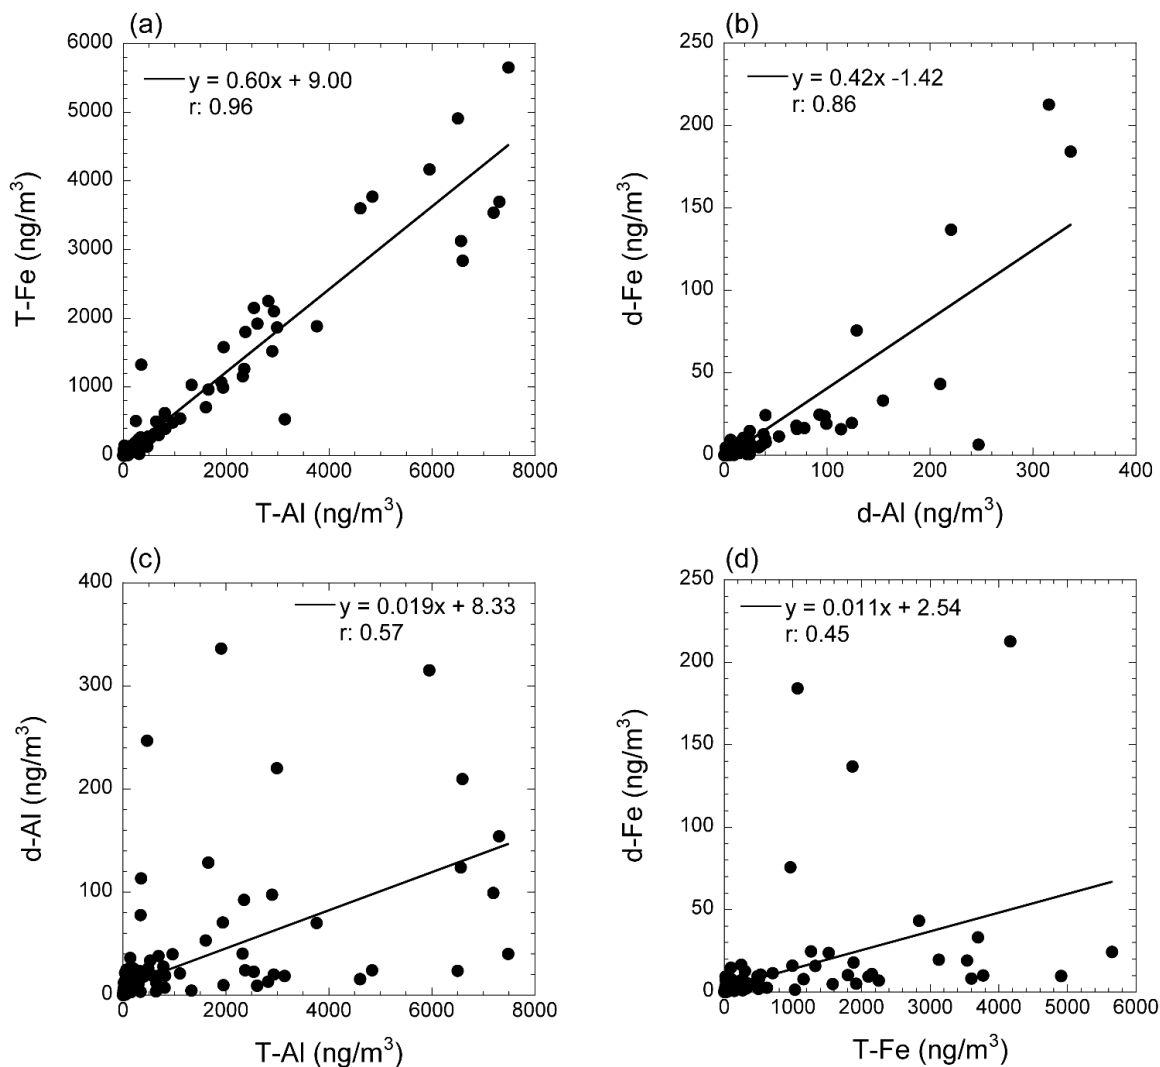

**Figure S4.** Scatter plots (a) between T-Al and T-Fe concentrations, (b) between d-Al and d-Fe concentrations, (c) between T-Fe and d-Fe concentrations, and (d) between T-Al and d-Al concentrations in aerosol particles collected in the Atlantic Ocean.

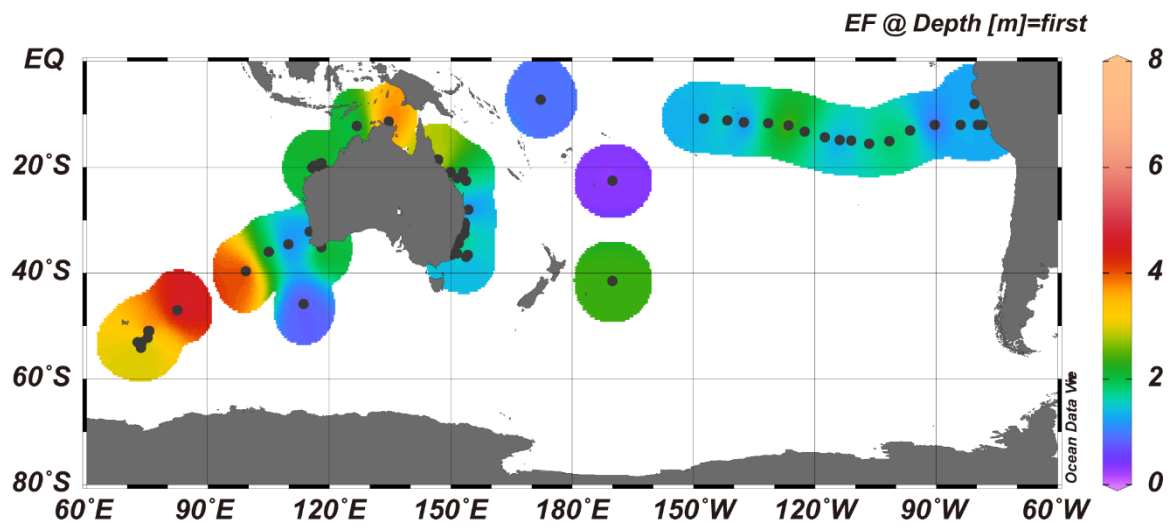

Figure S5. Spatial distribution of EFs in South Pacific TSP.

## Reference

- Sakata, K., Kurisu, M., Takeichi, Y., Sakaguchi, A., Tanimoto, H., Tamenori, Y. et al. (2022). Iron (Fe) speciation in size-fractionated aerosol particles in the Pacific Ocean: The role of organic complexation of Fe with humic-like substances in controlling Fe solubility, *Atmospheric Chemistry Physics*, 22, 9461–9482, <https://doi.org/10.5194/acp-22-9461-2022>.
- Sakata, K., Kurisu, M., Tanimoto, H., Sakaguchi, A., Uematsu, M., Miyamoto, C., Takahashi, Y. (2018) Custom-made PTFE filters for ultra-clean size-fractionated aerosol sampling for trace metals. *Marine Chemistry*, 206, 100– 108. <https://doi.org/10.1016/j.marchem.2018.09.009>.
